# Supplementary material for: Target-responsive dumbbell probe-mediated rolling circle amplification strategy for highly sensitive Hg2+ detection
Source: Royal Society of Chemistry journal article supplement (doi:10.1039/c4ra02266a), 2014-01-01
Supplement: c4ra02266a1.pdf [file c4ra02266a1.pdf]

1 **Target-Responsive dumbbell probe-mediated rolling circle**  
2 **amplification strategy for highly sensitive Hg<sup>2+</sup> detection**

3

4 **Qingwang Xue<sup>a</sup>, Yanqin Lv<sup>a</sup>, Yuanfu Zhang<sup>a</sup>, Qiaoli Yue<sup>a</sup>, Shuling Xu<sup>a</sup>, Rui Li**  
5 **<sup>a</sup>, Lei Wang<sup>a</sup>, Haibo Li<sup>a</sup>, Xiaohong Gu<sup>b</sup>, Shuqiu Zhang<sup>b</sup>, Jifeng Liu<sup>a\*</sup>**

6 *<sup>a</sup> Department of Chemistry, Liaocheng University, Liaocheng, 252059, Shandong,*  
7 *China.*

8 *<sup>b</sup>Shandong Provincial Key Lab of Test Technology on Food Quality and*  
9 *Safety, Shandong Academy of Agricultural Sciences, Jinan, 250100,*  
10 *China.*

11

12

13

14

15

16

17

18

19

20

Corresponding author:

21 Tel: +86-635-8239001; fax: +86-635-8239001. Email: [liujifeng111@gmail.com](mailto:liujifeng111@gmail.com)

22

23

24

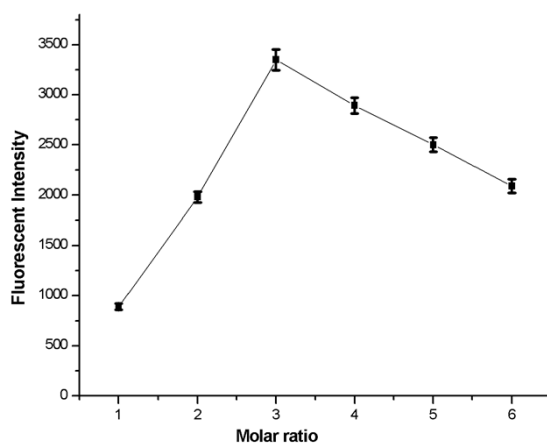

25

26 **Fig. S1.** The effect of the molar ratio of D-DNA to the p-DNA on the fluorescence  
27 response of  $\text{Hg}^{2+}$  sensing system. Condition:  $\text{Hg}^{2+}$ : 10 nM; p-DNA: 10 nM.

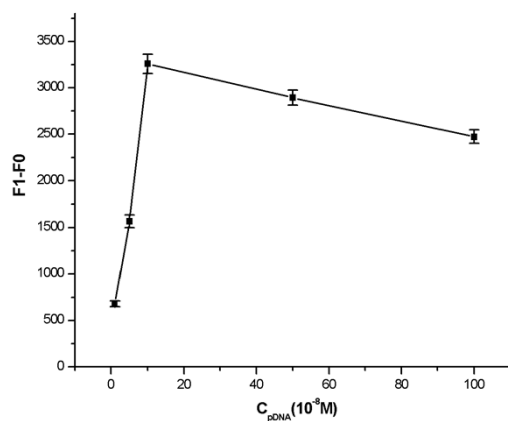

28

29

(A)

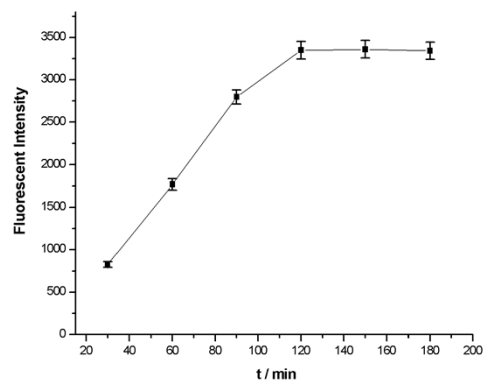

(B)

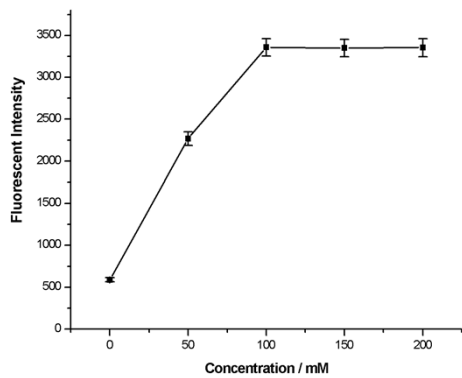

30

31

(C)

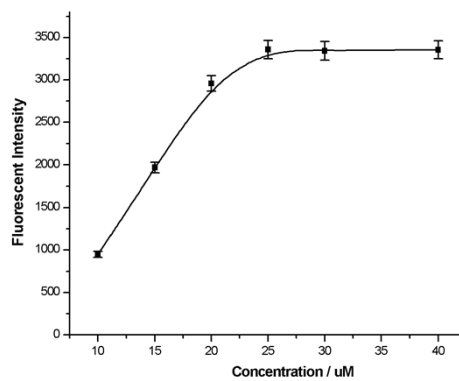

(D)

32 **Fig. S2.** The effect of (A) the concentration of  $\text{Hg}^{2+}$ -p-DNA; (B) D-RCA reaction  
33 time; (C) the concentration of  $\text{K}^+$  and (D) the concentration of NMM on the  
34 fluorescent intensity signal responding to 10 nM  $\text{Hg}^{2+}$ .

35

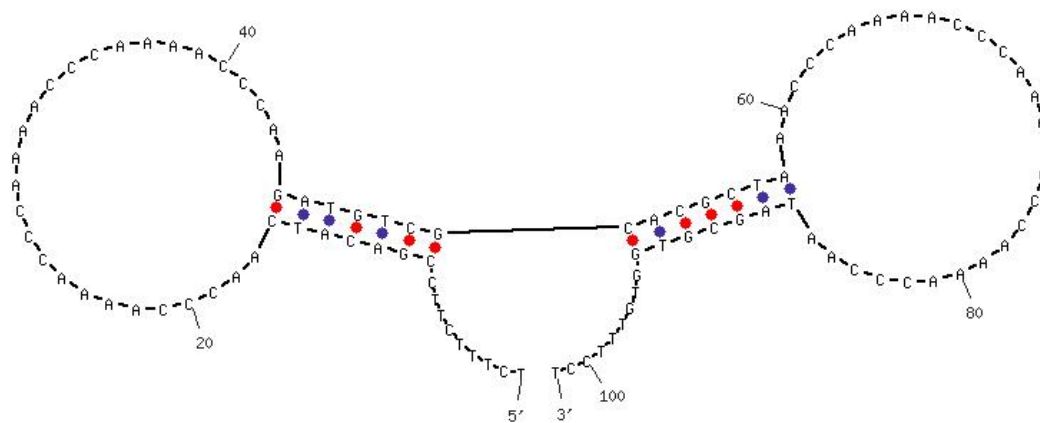

36

37 **Fig. S3.** Structure of the dumbbell probe (D-DNA).

38
